# Supplementary material
Source: PubMed Central journal article supplement (PMC5127749)
Supplement: NIHMS824856-supplement-Supplemental_Material.pdf [file NIHMS824856-supplement-Supplemental_Material.pdf]

## **Supplemental Material**

### **Expanded Methods**

#### **Transcript and Protein Analysis**

Isolation of mRNA was performed using the Rneasy kit (Qiagen) and reverse transcription was performed with Omniscript (Qiagen). Quantitative RT-PCR was performed using validated Taqman® (Life Technologies) assays, except for the nuclear isoform transcript of CAMK2D (custom Taqman® assay) and RCAN 1.2 (SYBR® Green assay) (see Supplemental Table 1). On target PCR amplification of the PCR product was validated for both the latter assays using gel electrophoresis, DNA extraction, and Sanger sequencing.

Protein immunoblotting was performed using standard methods. All blots were blocked with 5% milk and incubated overnight unless otherwise stated. The antibodies and specific conditions are as follows: SERCA2 (Thermo Pierce MA3-919, 1:1000), PLN (Millipore 05-205, 1:1000), Thr17-phospho-PLN (Badrilla, UK A010-13, 1:5000), Ser16-phospho-phospholamban (Badrilla, UK A010-12, 1:5000), Ca<sub>v</sub>1.2 (Alomone Labs, Israel ACC-003, 1:500, blocked with 5% nonfat milk in PBS, 0.3% Tween, 0.05% NaN<sub>3</sub>), NCX1 (Thermo Pierce MA3-926, 1:1000), and CSQ2 (Thermo Pierce PA1-913, 1:1000).

Primary antibodies were visualized with a secondary goat anti-rabbit antibody or goat anti-mouse antibody (Licor) diluted 1:5000 for 45 minutes. Imaging and densitometry

analyses were performed using the LI-COR5 Odyssey laser scanner and band intensity was normalized to GAPDH as a protein loading control.

### **SERCA Uptake Assay**

SERCA  $\text{Ca}^{2+}$  uptake was measured as previously described.<sup>1</sup> In brief, 50 mg of frozen human heart tissue was homogenized in 750  $\mu\text{l}$  of buffer containing 50 mM  $\text{KH}_2\text{PO}_4$ , 10 mM NaF, 1 mM EDTA, 300 mM sucrose, 0.3 mM phenylmethylsulfonyl fluoride, and 0.5 mM dithiothreitol (pH 7.0). Additional buffer was added to achieve a uniform protein concentration of 5 $\mu\text{g}/\mu\text{l}$ . Sodium azide inhibited  $\text{Ca}^{2+}$  uptake by the mitochondria, whereas ruthenium red and procaine inhibited  $\text{Ca}^{2+}$  release from the SR.  $\text{Ca}^{2+}$  uptake was measured over a range of pCa values from 8 to 5 in uptake buffers containing potassium oxalate as a quantitative marker for SR vesicles. After a 2-min pre-incubation of the reaction mixture containing 150  $\mu\text{Ci}/\text{ml}$   $^{45}\text{Ca}$  at 37°C, 75  $\mu\text{g}$  of ventricular homogenate were added. At exactly 2 min at 37°C, the reaction was stopped by filtration through a 45- $\mu\text{m}$  Millipore filter and washed with a cold buffer containing 20 mM Tris and 2 mM EGTA (pH 7.0). The SERCA  $\text{Ca}^{2+}$  uptake velocity was calculated by determining the amount of  $^{45}\text{Ca}$  bound to the Millipore filters divided by 2 min. Total SERCA uptake capacity at each pCa was also determined by allowing reactions to continue for 1 hour at 37°C before filtering. Each measurement was performed in triplicate. Reactions were repeated for a subset of samples without phenylmethylsulfonyl fluoride and with 2.7 units/ $\mu\text{l}$  lambda phosphatase (NEB). Phosphatase was incubated with samples on ice for 15 minutes since incubation at

room temperature or at 37 C, as recommended by the manufacturer to achieve complete dephosphorylation, substantially reduces signal from the assay.

### **[<sup>3</sup>H]Ryanodine Binding**

[<sup>3</sup>H]Ryanodine binding to cell lysates was performed as previously described.<sup>2</sup> To maximize signal from limited quantity of surgical myectomy tissue, total binding was determined at the optimal calcium concentration (pCa 5) to reflect maximal ryanodine activity. A binding mixture of 300 µl contained 30 µl of lysate ( 125 µg protein), plus a standard mixture of 200 mM KCl, 25 mM Tris/50 mM Hepes (pH 7.4), 3 mM MgATP, 1 mM EGTA, 5 nM [<sup>3</sup>H]ryanodine (68.4 Ci·mmol<sup>-1</sup>, Dupont NEN, Wilmington, DE, USA), and protease inhibitors. The reaction was incubated for 2 hr at 36°C, filtered on Whatman GF/B glass filters (Whatman, Clifton, NJ, USA) presoaked with 1% polyethylenimine and washed twice with 5 mL of distilled water using a Brandel M24-R cell harvester (Gaithersburg, MD, USA). Non-specific binding was determined in the presence of 20 µM unlabelled ryanodine and was subtracted from each sample. Ryanodine modifications by nitrosylation and oxidation were determined by addition of 500 mM spermine NONOate or 5 mM H<sub>2</sub>O<sub>2</sub>, respectively, to the binding buffer prior to incubation. Each measurement was performed in triplicate.

### **Transcription Factor Studies**

Nuclear protein extraction was performed as previously described with modifications.<sup>3</sup> To prepare nuclei, frozen heart tissue was pulverized in liquid N<sub>2</sub>, then resuspended in NB1 (10 mM Tris, pH 8.0, 10 mM NaCl, 3 mM MgCl<sub>2</sub>, 0.5 mM DTT, 0.1% Triton X-100,

0.1 M sucrose). The tissue was rotor-homogenized with 3 pulses of 15 seconds each on ice, gently mixed with NB2 (NB1 with added 0.25 M sucrose), then passed through a 40  $\mu$ m filter. NB3 (10 mM Tris, pH 8.0, 5 mM MgCl<sub>2</sub>, 0.5 mM DTT, 0.33 M sucrose) was layered under the suspension, and the nuclei were pelleted at 1000 g for 5 min. Isolated nuclei were re-suspended in 25 mM HEPES, pH 7.8, 420 mM NaCl, 1.5 mM MgCl<sub>2</sub>, 0.2 mM EDTA, 0.5 mM DTT, 25% glycerol, and protease inhibitors, and slowly rotated at 4 °C for 30 min. Samples were then centrifuged at 4 °C in a tabletop centrifuge at maximum speed. The supernatant was transferred to a clean tube to be used for the transcription factor assays.

Activation of MEF2 was assessed by an ELISA-based method per manufacturer's recommended conditions (Active Motif, Carlsbad, CA). 10  $\mu$ g of nuclear extract was added to wells coated with oligonucleotides containing the transcription factor consensus binding site and incubated for one hour on a plate shaker. Wells were treated with primary antibody (MEF2) for one hour, followed by an HRP-conjugated secondary antibody. Quantification was performed using a microplate reader at 450 nm with a reference wavelength of 655 nm. C2C12 nuclear extract was used as a positive control. Activation of NFATc1 was assessed by a similar ELISA-based method (Active Motif, Carlsbad, CA). Nuclear extract from Jurkat T-cells served as a positive control.

## Supplemental Figure 1.

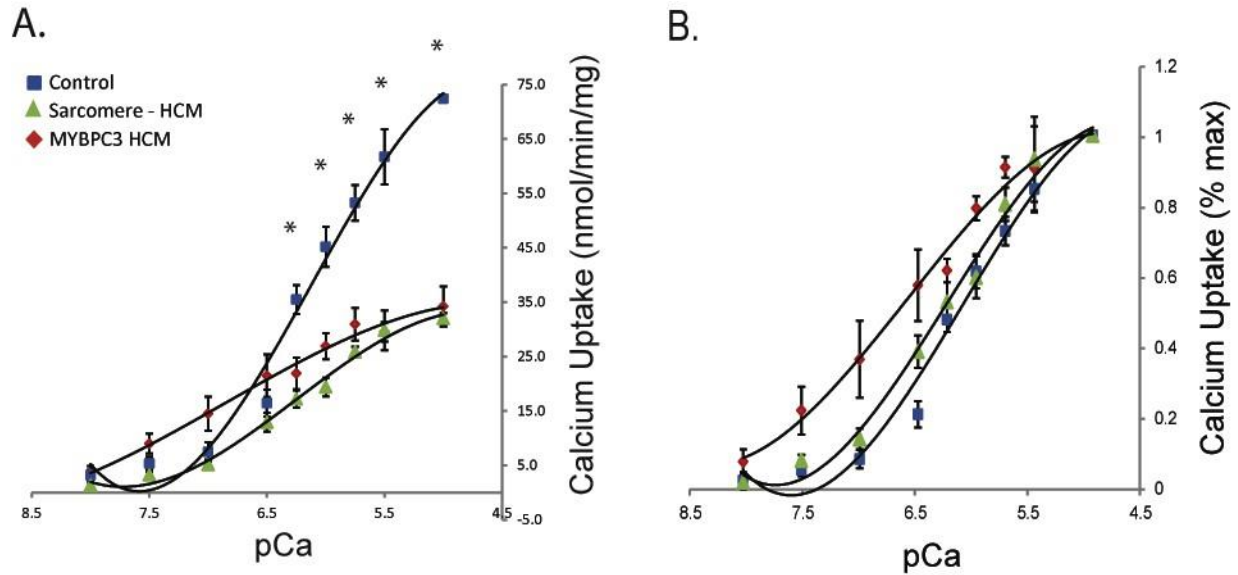

### Supplemental Figure 1 Legend:

A. SERCA uptake velocity measured by  $^{45}\text{Ca}$  SERCA uptake assay following pre-treatment with lambda phosphatase and in the absence of phosphatase inhibitor (control n=3, *MYBPC3*-mutation HCM n=3, sarcomere-negative HCM n=3). B.

Normalized SERCA uptake velocity following phosphatase pre-treatment. \*p<0.05 for controls vs. all HCM using the Mann-Whitney test with exact p-value calculation for small sample sizes.

**Supplemental Table 1**

| Subject                      | Source of Tissue | DNA Mutation         | Protein Mutation     | Age | Gender | MWT (mm) | EF | Rest Grad | CCB | BB  | NYHA Class | Septal Anatomy | Fibrosis on MRI | NSVT | CaMKII Activation | SERCA2 Reduced | SERCA Uptake Reduced |
|------------------------------|------------------|----------------------|----------------------|-----|--------|----------|----|-----------|-----|-----|------------|----------------|-----------------|------|-------------------|----------------|----------------------|
| <b>No Sarcomere Mutation</b> |                  |                      |                      |     |        |          |    |           |     |     |            |                |                 |      |                   |                |                      |
| 1                            | Myectomy         |                      |                      | 59  | M      | 19       | 68 | 44        | No  | Yes | 3          | sigmoidal      | No              | No   | No                | Yes            | Yes                  |
| 2                            | Myectomy         |                      |                      | 62  | M      | 26       | 75 | 29        | Yes | Yes | 2          | reverse        | -               | Yes  | No                | Yes            |                      |
| 3                            | Myectomy         |                      |                      | 26  | M      | 20       | 60 | 38        | No  | Yes | 3          | reverse        | Yes             | No   | No                | Yes            | Yes                  |
| 4                            | Myectomy         |                      |                      | 47  | F      | 16       | 70 | 105       | No  | Yes | 4          | neutral        | -               | No   | No                | Yes            |                      |
| 5                            | Myectomy         |                      |                      | 41  | M      | 23       | 66 | 91        | No  | Yes | 1          | reverse        | Yes             | No   |                   | Yes            |                      |
| 6                            | Myectomy         |                      |                      | 52  | M      | 20       | 72 | 200       | No  | No  | 3          | reverse        | No              | No   | Borderline        | Yes            | Yes                  |
| 7                            | Myectomy         |                      |                      | 51  | M      | 22       | 65 | 15        | No  | Yes | 2          | reverse        | Yes             | Yes  | No                | Yes            |                      |
| 8                            | Myectomy         |                      |                      | 58  | M      | 20       | 65 | 83        | No  | Yes | 1          | neutral        | No              | Yes  |                   | Yes            | Yes                  |
| 9                            | Myectomy         |                      |                      | 47  | M      | 18       | 60 | 25        | Yes | Yes | 2          | sigmoidal      | No              | No   |                   | Yes            |                      |
| 10                           | Myectomy         |                      |                      | 43  | F      | 20       | 65 | 98        | No  | Yes | 2          | sigmoidal      | No              | No   | No                | Yes            | Yes                  |
| <b>MYBPC3 Mutation</b>       |                  |                      |                      |     |        |          |    |           |     |     |            |                |                 |      |                   |                |                      |
| 11                           | Myectomy         | 1484G>A              | Arg495Gln            | 27  | F      | 24       | 60 | 60        | No  | Yes | 2          | NA             | -               | No   | Yes               | Yes            |                      |
| 12                           | Myectomy         | 3294 G>A             | W1098*               | 33  | M      | 36       | 76 | 112       | No  | Yes | 3          | reverse        | Yes             | Yes  |                   | Yes            | Yes                  |
| 13                           | Myectomy         | 3330+2 T>G           | (splice)             | 40  | M      | 41       | 65 | 72        | No  | Yes | 3          | reverse        | -               | Yes  |                   | Yes            | Yes                  |
| 14                           | Myectomy         | 2308 G>A             | (splice)             | 34  | M      | 24       | 76 | 27        | No  | Yes | 1          | reverse        | No              | Yes  |                   | Yes            | Yes                  |
| 15                           | Myectomy         | 1624+4 A>T           | (splice)             | 43  | M      | 23       | 80 | 21        | Yes | Yes | 2          | reverse        | -               | Yes  | Yes               | Yes            | Yes                  |
| 16                           | Myectomy         | 1484G>A              | Arg495Gln            | 10  | F      | 45       | 80 | 50        | Yes | No  | 2          | reverse        | Yes             | No   | Yes               | Yes            | Yes                  |
| 17                           | Myectomy         | 3697 C>T             | Gln1233*             | 39  | F      | 24       | 75 | 49        | No  | Yes | 1          | reverse        | Yes             | No   | Yes               | Yes            |                      |
| 18                           | Myectomy         | 1624G>C              | Glu542Gln            | 47  | M      | 18       | 70 | 21        | No  | Yes | 3          | reverse        | -               | Yes  |                   | Yes            | Yes                  |
| 19                           | Myectomy         | 2670 G>A             | Trp890*              | 41  | F      | 17       | 70 | 111       | No  | Yes | 3          | neutral        | -               | Yes  | Yes               | Yes            | Yes                  |
| 20                           | Myectomy         | 2905 + 1G>A<br>3742_ | (splice)<br>Gly1248_ | 48  | F      | 19       | 80 | 163       | No  | Yes | 2          | reverse        | No              | Yes  |                   | Yes            |                      |
| 21                           | Myectomy         | 3759dup              | Cys1253dup           | 43  | F      | 21       | 75 | 74        | No  | Yes | 3          | reverse        | Yes             | No   |                   | Yes            |                      |
| 22                           | Myectomy         | 772 G>A              | (splice)             | 28  | M      | 21       | 70 | 182       | Yes | No  | 2          | sigmoidal      | Yes             | No   | Yes               | Yes            |                      |
| 23                           | Myectomy         | 772 G>A              | (splice)             | 43  | F      | 30       | 83 | 63        | No  | Yes | 1          | reverse        | Yes             | Yes  | Yes               | Yes            |                      |
| 24                           | Myectomy         | 1928-2 A>G           | (splice)             | 57  | F      | 19       | 72 | 94        | No  | Yes | 2          | sigmoid        | -               | No   | Yes               | Yes            |                      |
| 25                           | Myectomy         | 927-9 G>A            | (splice)             | 59  | M      | 23       | 70 | 44        | No  | Yes | 3          | reverse        | -               | Yes  | Yes               | Yes            |                      |
| 26                           | Myectomy         | 1624+4 A>T           | (splice)             | 31  | F      | 21       | 70 | 97        | No  | Yes | 1          | neutral        | No              | No   |                   | Yes            |                      |
| 27                           | Myectomy         | 3233 G>A             | Trp1078*             | 35  | F      | 21       | 76 | 64        | Yes | No  | 2          | reverse        | No              | No   | Yes               | Yes            |                      |
| <b>MYH7 Mutation</b>         |                  |                      |                      |     |        |          |    |           |     |     |            |                |                 |      |                   |                |                      |
| 29                           | Myectomy         | 3286 G>T             | Asp1096Tyr           | 52  | M      | 18       | 65 | 38<br>0   | No  | Yes | 3          | sigmoid        | No              | No   | Yes               | Yes            | Yes                  |

|    |                  |                    |                   |    |   |    |    |    |     |     |   |         |     |     |            |     |     |
|----|------------------|--------------------|-------------------|----|---|----|----|----|-----|-----|---|---------|-----|-----|------------|-----|-----|
| 30 | Myectomy         | <b>5135G&gt;A</b>  | <b>Arg1712Gln</b> | 36 | M | 17 | 75 | 86 | Yes | Yes | 2 | reverse | No  | No  |            | Yes | Yes |
| 31 | Myectomy         | <b>4816 C&gt;T</b> | <b>Arg1606Cys</b> | 59 | M | 20 | 80 | 90 | No  | Yes | 3 | sigmoid | No  | No  | Borderline | Yes |     |
| 32 | Myectomy         | <b>968 T&gt;A</b>  | <b>Ile323Asn</b>  | 12 | M | 23 | 91 | 82 | No  | No  | 1 | NA      | Yes | Yes |            | Yes |     |
| 33 | Myectomy         | <b>1370 T&gt;C</b> | <b>Ile457Thr</b>  | 72 | F | 16 | 75 | 39 | No  | No  | 3 | neutral | Yes | No  | No         | Yes | Yes |
| 34 | Myectomy         | <b>1816 G&gt;A</b> | <b>Val606Met</b>  | 39 | F | 17 | 75 | 70 | No  | Yes | 3 | reverse | Yes | No  |            | Yes |     |
| 35 | Surgical explant | <b>4130C&gt;T</b>  | <b>Thr1377Met</b> | 45 | F | 16 | 60 | -  | No  | Yes | 3 | neutral | -   | Yes | Yes        | Yes | Yes |
| 36 | Surgical explant | <b>2123G&gt;C</b>  | <b>Gly708Ala</b>  | 36 | F | 19 | 60 | -  | No  | No  | 4 | reverse | -   | Yes | Yes        | Yes | Yes |

MWT = maximal wall thickness. EF = left ventricular ejection fraction. Rest Grad = resting left ventricular outflow tract gradient (mm Hg). CCB = calcium channel blocker prescription. BB = beta blocker prescription. NYHA Class = New York Heart Association congestive heart failure symptom class. Septal anatomy = morphology of left ventricular septal hypertrophy. Reverse = reverse curvature. NSVT = nonsustained ventricular tachycardia. \*CaMKII activation defined as at least 1.5-fold upregulation of pT287-CaMKII ("Borderline" if at least 1.3-fold upregulation). ^SERCA2 reduced defined as a reduction in SERCA2 mRNA or protein abundance by at least 20% compared to average of controls. +SERCA uptake reduced defined as a reduction in SERCA uptake velocity at pCa=5 of at least 20% of average of controls.

**Supplemental Table 2.**

| <b>Gene</b>                             | <b>qRT-PCR Assay</b> | <b>Assay #</b> | <b>Primers</b> |
|-----------------------------------------|----------------------|----------------|----------------|
| <b>ATP2A2<br/>(SERCA2)</b>              | <b>Taqman</b>        | Hs00544877_m1  | -              |
| <b>CACNA1C (L-type calcium channel)</b> | <b>Taqman</b>        | Hs00167681_m1  | -              |
| <b>CAMK2D</b>                           | <b>Taqman</b>        | Hs00943550_m1  | -              |
| <b>CAMK2D Nuclear</b>                   | <b>Taqman</b>        |                |                |
| <b>CAMK2G</b>                           | <b>Taqman</b>        | Hs00538454_m1  | -              |
| <b>CASQ2<br/>(calsequestrin)</b>        | <b>Taqman</b>        | Hs00154286_m1  | -              |
| <b>MEF2A</b>                            | <b>Taqman</b>        | Hs01050409_m1  | -              |
| <b>MEF2C</b>                            | <b>Taqman</b>        | Hs00231149_m1  | -              |
| <b>MEF2D</b>                            | <b>Taqman</b>        | Hs00954735_m1  | -              |
| <b>PLN</b>                              | <b>Taqman</b>        | Hs00160179_m1  |                |



|                                                       |               |               |                         |
|-------------------------------------------------------|---------------|---------------|-------------------------|
| <b>(phospholamban)</b>                                |               |               |                         |
| <b>PPP3CB</b>                                         | <b>Taqman</b> | Hs00917458_m1 | -                       |
| <b>(Calcineurin,<br/>catalytic subunit)</b>           |               |               |                         |
| <b>RCAN 1.2</b>                                       | <b>Sybr</b>   | -             | GCTCCGCCAAATCCAGACAA    |
|                                                       | <b>Green</b>  |               | GCTGCGTGCAATTCATACTTTTC |
| <b>RYR (ryanodine)</b>                                | <b>Taqman</b> | Hs00892883_m1 |                         |
| <b>SLC8A1 (NCX,<br/>sodium-calcium<br/>exchanger)</b> | <b>Taqman</b> | Hs01062258_m1 | -                       |

## References

1. Guinto, P.J., Haim, T.E., Dowell-Martino, C.C., Sibinga, N. & Tardiff, J.C. Temporal and mutation-specific alterations in Ca<sup>2+</sup> homeostasis differentially determine the progression of cTnT-related cardiomyopathies in murine models. *Am J Physiol Heart Circ Physiol* 297:H614-626.
2. Loaiza, R., *et al.* Heterogeneity of ryanodine receptor dysfunction in a mouse model of catecholaminergic polymorphic ventricular tachycardia. *Circ Res* 112:298-308.
3. Phelps, D.E. & Dressler, G.R. Identification of novel Pax-2 binding sites by chromatin precipitation. *J Biol Chem* 271:7978-7985.
